# Supplementary material for: Global Initiative for Chronic Obstructive Lung Disease 2023 Report: GOLD Executive Summary
Source: PubMed Central journal article supplement — Eur Respir J. 2023 Apr 3;61(4):2300239. doi: 10.1183/13993003.00239-2023 (PMC10066569; doi:10.1183/13993003.00239-2023), 2023-04-03
Supplement: ERJ-00239-2023.Shareable.pdf [file ERJ-00239-2023.Shareable.pdf]

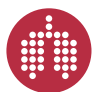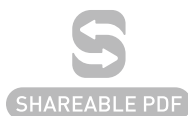

# Global Initiative for Chronic Obstructive Lung Disease 2023 Report: GOLD Executive Summary

Alvar Agustí<sup>1,22</sup>, Bartolome R. Celli <sup>2,22</sup>, Gerard J. Criner<sup>3</sup>, David Halpin<sup>4</sup>, Antonio Anzueto<sup>5</sup>, Peter Barnes<sup>6</sup>, Jean Bourbeau <sup>7</sup>, MeiLan K. Han<sup>8</sup>, Fernando J. Martinez<sup>9</sup>, Maria Montes de Oca<sup>10</sup>, Kevin Mortimer <sup>6,11,12</sup>, Alberto Papi <sup>13</sup>, Ian Pavord<sup>14</sup>, Nicolas Roche <sup>15</sup>, Sundeep Salvi<sup>16</sup>, Don D. Sin<sup>17</sup>, Dave Singh<sup>18</sup>, Robert Stockley<sup>19</sup>, M. Victorina López Varela<sup>20</sup>, Jadwiga A. Wedzicha<sup>6</sup> and Claus F. Vogelmeier<sup>21</sup>

<sup>1</sup>Univ. Barcelona, Hospital Clinic, IDIBAPS and CIBERES, Barcelona, Spain. <sup>2</sup>Brigham and Women's Hospital, Harvard Medical School, Boston, MA, USA. <sup>3</sup>Lewis Katz School of Medicine at Temple University, Philadelphia, PA, USA. <sup>4</sup>University of Exeter Medical School College of Medicine and Health University of Exeter, Exeter, UK. <sup>5</sup>South Texas Veterans Health Care System, University of Texas, San Antonio, TX, USA. <sup>6</sup>National Heart and Lung Institute, Imperial College London, London, UK. <sup>7</sup>McGill University Health Centre, McGill University, Montreal, QC, Canada. <sup>8</sup>University of Michigan, Ann Arbor, MI, USA. <sup>9</sup>Weill Cornell Medical Center/New York-Presbyterian Hospital, New York, NY, USA. <sup>10</sup>Hospital Universitario de Caracas Universidad Central de Venezuela Centro Médico de Caracas, Caracas, Venezuela. <sup>11</sup>Liverpool University Hospitals NHS Foundation Trust, Liverpool, UK. <sup>12</sup>School of Clinical Medicine, College of Health Sciences, University of KwaZulu-Natal, Durban, South Africa. <sup>13</sup>University of Ferrara, Ferrara, Italy. <sup>14</sup>Respiratory Medicine Unit and Oxford Respiratory NIHR Biomedical Research Centre, Nuffield Department of Medicine, University of Oxford, Oxford, UK. <sup>15</sup>Pneumologie, Hôpital Cochin AP-HP.Centre, Université Paris, Paris, France. <sup>16</sup>Pulmocare Research and Education (PURE) Foundation, Pune, India. <sup>17</sup>St. Paul's Hospital, University of British Columbia, Vancouver, BC, Canada. <sup>18</sup>University of Manchester, Manchester, UK. <sup>19</sup>University Hospital, Birmingham, UK. <sup>20</sup>Universidad de la República, Hospital Maciel Montevideo, Montevideo, Uruguay. <sup>21</sup>Department of Medicine, Pulmonary and Critical Care Medicine, University Medical Center Giessen and Marburg, Philipps-University, German Center for Lung Research (DZL), Marburg, Germany. <sup>22</sup>Co-first authors.

Corresponding author: Alvar Agustí ([aagusti@clinic.cat](mailto:aagusti@clinic.cat))

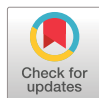

Shareable abstract (@ERSpublications)

**Executive summary of the Global Strategy for Prevention, Diagnosis and Management of COPD 2023: the latest evidence-based strategy document from the Global Initiative for Chronic Obstructive Lung Disease (GOLD)** <https://bit.ly/3KCaTGe>

**Cite this article as:** Agustí A, Celli BR, Criner GJ, *et al.* Global Initiative for Chronic Obstructive Lung Disease 2023 Report: GOLD Executive Summary. *Eur Respir J* 2023; 61: 2300239 [DOI: 10.1183/13993003.00239-2023].

This single-page version can be shared freely online.

Copyright ©2023 the American Thoracic Society.

This article is open access and distributed under the terms of the Creative Commons Attribution Non-Commercial No Derivatives License 4.0. For commercial usage and reprints, please e-mail Diane Gern ([dgern@thoracic.org](mailto:dgern@thoracic.org))

This article has an editorial commentary:  
<https://doi.org/10.1183/13993003.00366-2023>

Received: 9 Feb 2023  
Accepted: 10 Feb 2023

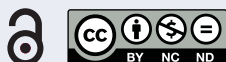

The Global Initiative for Chronic Obstructive Lung Disease (GOLD) has published the complete 2023 GOLD report, which can be freely downloaded from its webpage ([www.goldcopd.org](http://www.goldcopd.org)) together with a “pocket guide” and “teaching slide set” [1]. It contains important changes compared to earlier versions, and incorporates 387 new references [1]. Here, we present an executive summary of this GOLD 2023 report [1] that summarizes aspects that 1) are relevant from a clinician's perspective and 2) updates evidence published since the prior executive summary in 2017.
